# Supplementary material for: RNA-binding proteins direct myogenic cell fate decisions
Source: eLife journal article supplement (doi:10.7554/elife.75844), 2022-05-23

NX-input (0.1%)  
IgG-input (1%)  
IgG beads (1%)  
NX-input (1%)  
NX-beads (20%)  
M-X protein ladder  
A-IP (20%)  
A-input (1%)  
B-IP (20%)  
B-input (1%)

— 130 kD  
— 93 kD  
— 79 kD (pink)  
— 53 kD  
— 41 kD  
— hnRNP A2B1 (35 kD)  
— 30 kD  
— 22 kD (green)  
— 14 kD  
— 9 kD

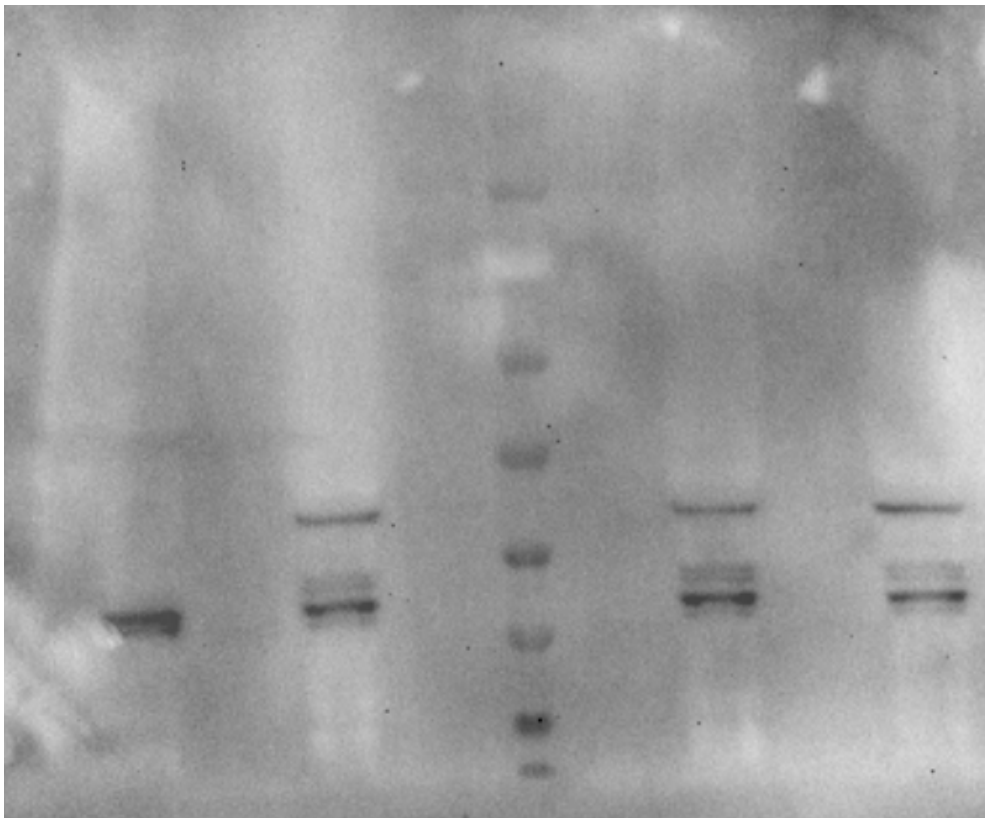

Supplement: fig6-figsupp1-data1 [file elife-75844-fig6-figsupp1-data1-v1.zip]
