# Supplementary material for: RNA-binding proteins direct myogenic cell fate decisions
Source: eLife journal article supplement (doi:10.7554/elife.75844), 2022-05-23

Myoblast 1:25 RNase dilution

Myoblast 1:2 RNase dilution

Myotube 1:25 RNase dilution

Myotube 1:2 RNase dilution

Myoblast IgG

Myotube IgG

170 kD —  
130 kD —  
93 kD —  
70 kD —  
53 kD —  
41 kD —  
30 kD —  
22 kD —  
14 kD —

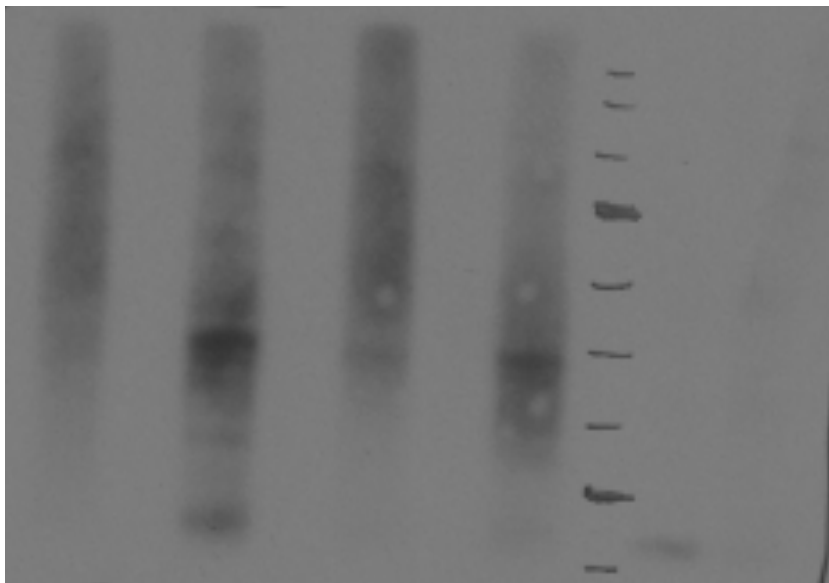

Supplement: fig6-figsupp1-data1 [file elife-75844-fig6-figsupp1-data1-v1.zip]
