# Supplementary material for: RNA-binding proteins direct myogenic cell fate decisions
Source: eLife. 2022 Jun 13;11:e75844. doi: 10.7554/eLife.75844 (PMC9191894; doi:10.7554/eLife.75844)
Supplement: Supplementary file 6. [file elife-75844-supp6.xlsx]

## Sheet: RBPs
RNAbindingprotein
Raver2
Nova1
Dazl
Lin28b
Zc3h12c
Larp6
Dppa5a
Rbm11
Nkrf
Cpeb2
Rbm47
Zc3hav1l
Rbm43
Rbm45
Hltf
Zfp239
Thumpd2
Pabpc1l
Rbm41
Enox1
Ppargc1a
Cpeb1
Mex3b
Dgkq
Sugp2
Cpeb3
Tdrkh
Msi1
Lemd3
Raver1
Rbm44
Zc3h11a
Nsun6
Rbpms
Tep1
Gpkow
Zrsr1
Rbm4
Tut1
Enox2
Igf2bp3
Wrn
Unkl
Cstf2t
Ddx59
Xpo5
Nupl2
U2af1l4
Lsm11
Rnf113a1
Ddx51
Leng9
Cpeb4
Unk
Dhx57
Mbnl3
Mcm3ap
Parp14
Srbd1
Parp12
Mex3d
Zc3h3
Mthfsd
Samd14
Rcan2
Csdc2
Synj1
Ythdc2
Tnrc6c
Zc3h12a
Pcbp3
Alkbh8
Bud13
Synj2
Spen
Aggf1
Parn
Prr3
Trmt2a
Prpf3
Aco1
Dgcr8
Pprc1
Stau2
Zc3h8
Upf1
Uhmk1
Rbm15
Zc3h10
Khdrbs3
Rbm15b
Dnajc17
Zgpat
Dhx8
Igf2bp2
Gemin5
Mex3c
Ythdf3
Toe1
Pspc1
Rdm1
Ankhd1
Zc3h4
Utp18
Mex3a
Wdr3
Rbm20
Fubp3
Snrnp35
Setd1a
Nufip1
Rbm26
Akap1
Trove2
Helz
Larp1b
Rc3h2
Ttc14
Tmem63a
Srsf9
Supv3l1
Bicc1
Zc3h7b
Zc3h7a
Ythdf1
Srsf4
Setd1b
Nol8
Phf6
Khsrp
Cstf2
Akap8l
Fastkd2
Rc3h1
Ddx55
Ascc1
Mtpap
Ireb2
Cpsf7
Pnpt1
Drosha
Rbm19
Pdcd11
Rnpc3
Prpf4
Pabpn1
Rbms3
Dus3l
Mkrn2
Zc3h18
Myef2
Cherp
Ppp1r10
Aqr
Aptx
Xrcc6
Sart3
Zc3h14
Kin
Fxr2
Sdad1
Samd4b
Samd4
Ppargc1b
Zc3hav1
Krr1
Aatf
Fmr1
Ythdc1
Pus1
Cpsf4
Fto
Rbpms2
Hnrnpll
Tnrc6b
Rbmx2
Ddx42
Thumpd1
Rsf1
Ppil4
Rbm17
Rbm10
Gtf3a
Mkrn1
Cdc40
Rbm38
Thumpd3
Larp1
Snrpn
Rbm6
Poldip3
Lsm10
Larp4
Htatsf1
Grsf1
Ptbp2
Rbm28
Zc3h13
Rbm5
Ddx6
Grwd1
Rbm14
Dhx30
Larp4b
Tiparp
Safb
Mcts2
Tia1
Tnrc6a
Tbrg4
Pum2
Zfp36l2
Rbm22
Zfr
Prpf8
Rbm34
Rbm18
Cnot4
Ddx52
Elavl1
Snd1
Nsun2
Aars
Rbm27
Hnrnpul1
Taf15
Hnrnph3
Rbm4b
Rbp1
Smndc1
Nipbl
Rbmx
Fam120a
Gtf2f1
Ptbp3
Hnrnph2
Pum1
Trnau1ap
Ythdf2
Hnrnpl
Eftud2
Rbm7
Ilf3
Safb2
Sf3a1
Cpsf6
Sf1
Trmt1
Nol12
Khdrbs1
Tial1
Wdr43
Ppie
Sbds
Rbms2
Pabpc4
Rrp7a
Mbnl1
Sf3a3
Ptbp1
Upf3b
Ncbp2
Rbm24
Hnrnpd
Rbfox2
Celf1
Mcts1
Ywhag
Zrsr2
Zranb2
Srrt
Exosc5
Mbnl2
Hnrnpa0
Rbms1
Ankrd17
Zmat5
Dkc1
Zfp36
Srsf1
Tra2a
Larp7
Nip7
Uchl5
G3bp2
Slbp
Lsm1
Tardbp
Ddx21
Pno1
Msi2
Utp3
Hnrnpr
Sltm
Qk
Raly
Ddx3x
Zfp36l1
Matr3
Ccar1
Lsm2
Fxr1
Eif3b
Nolc1
Ddx24
Sfpq
Sf3b4
Srsf10
U2af2
Polr2g
Rbm42
Srsf2
Xrn2
Bclaf1
Hdlbp
Dazap1
Puf60
Srrm2
Hnrnph1
Abcf1
Gnl3
Zcrb1
Snrpa
Fubp1
Bccip
Zcchc17
Acin1
Rnps1
Eif4b
Fkbp4
Syncrip
Srsf7
Zc3h15
Ybx3
Carhsp1
Ilf2
Naa38
Srsf11
Srsf5
Csde1
Ppig
Cirbp
Eif2s1
Sf3b1
Pcbp1
Srrm1
Eif3d
Tra2b
Hnrnpm
Ewsr1
Snrpb2
Hnrnpu
Lsm3
Rbm25
Eif4h
Snrnp70
Lsm7
Pcbp4
G3bp1
Snrpc
Nono
Ybx1
Fus
Hnrnpdl
Eif3g
Ssb
Hnrnpab
Sub1
Snrpd3
Pcbp2
Hnrnpf
U2af1
Snrpd1
Rbm8a
Eif4g2
Hnrnpc
Lsm6
Rbm39
Hnrnpa3
Pabpc1
Metap2
Lsm4
Hnrnpk
Snrpg
Snrpf
Snrpb
Snrpd2
Eif3h
Hnrnpa2b1
Hnrnpa1
Serbp1
Ncl
Rbm3
Npm1
Rps11
Rps3

## Sheet: Sheet2
Table S6
RNA-binding proteins expressed in myogenic clusters 0 - 6.
